# Supplementary material for: Homoleptic Ni(ii) dithiocarbamate complexes as pre-catalysts for the electrocatalytic oxygen evolution reaction
Source: Royal Society of Chemistry journal article supplement (doi:10.1039/d2dt01971j), 2022-01-01
Supplement: d2dt01971j1.pdf [file d2dt01971j1.pdf]

## Supporting Information

### **Homoleptic Ni(II) Dithiocarbamate Complexes as Pre-catalysts for Electrocatalytic Oxygen Evolution Reaction**

Sarvesh Kumar Pal,<sup>a</sup> Baghendra Singh,<sup>b</sup> Jitendra Kumar Yadav,<sup>a</sup> Chote Lal Yadav,<sup>a</sup> Michael G. B. Drew,<sup>c</sup> Nanhai Singh\*,<sup>a</sup> Arindam Indra\*<sup>b</sup> and Kamlesh Kumar\*<sup>a</sup>

<sup>a</sup> Department of Chemistry, Institute of Science, Banaras Hindu University, Varanasi-221005, India

<sup>b</sup> Department of Chemistry, Indian Institute of Technology, Banaras Hindu University, Varanasi-221005, India

<sup>c</sup> Department of Chemistry, University of Reading, Whiteknights, Reading RG6,6AD, UK.

Email Address of Corresponding Authors: [kamlesh.kumar@bhu.ac.in](mailto:kamlesh.kumar@bhu.ac.in) (Kamlesh Kumar)

[arindam.chy@iitbhu.ac.in](mailto:arindam.chy@iitbhu.ac.in) (Arindam Indra), [nsingh@bhu.ac.in](mailto:nsingh@bhu.ac.in) (N. Singh)

| S No.              | Content                                                                                                                                                                                    | Page  |
|--------------------|--------------------------------------------------------------------------------------------------------------------------------------------------------------------------------------------|-------|
| <b>Fig. S1</b>     | IR spectra of potassium salt of Ligands <b>KL1-KL4</b> .                                                                                                                                   | 2-3   |
| <b>Fig. S2</b>     | IR spectra of complexes <b>1-4</b> .                                                                                                                                                       | 4-5   |
| <b>Fig. S3</b>     | <sup>1</sup> H, <sup>13</sup> C{ <sup>1</sup> H} potassium salt of Ligands <b>KL1-KL4</b> .                                                                                                | 6-9   |
| <b>Fig. S4</b>     | <sup>1</sup> H, <sup>13</sup> C{ <sup>1</sup> H} spectra of complexes <b>1-4</b>                                                                                                           | 10-13 |
| <b>Fig. S5</b>     | CV profiles for the electrochemical activation of complex <b>1-4</b> .                                                                                                                     | 15    |
| <b>Fig. S6</b>     | LSV profile for the oxygen evolution reaction of complex <b>2</b> @CC compared with Ni(II) salt derived Ni(O)OH@CC.                                                                        | 16    |
| <b>Fig. S7</b>     | LSV profile for the oxygen evolution reaction of complex <b>2</b> @CC in phosphate buffer                                                                                                  | 16    |
| <b>Fig. S8</b>     | Redox peak integration for the determination of number of active sites for the complexes <b>1-4</b>                                                                                        | 17    |
| <b>Fig. S9</b>     | Plot for the amount of theoretically calculated O <sub>2</sub> (blue line) and experimentally measured O <sub>2</sub> (green line) versus time for complex <b>2</b> . Faradaic Efficiency. | 20    |
| <b>Fig. S10</b>    | Differential pulse voltammetric profile for the complex <b>2</b> utilized for the determination of number electron transferred for the redox peak.                                         | 21    |
| <b>Fig. S11</b>    | IR, Solid UV-Vis and Powder XRD spectra of complex <b>2</b> after electro-catalysis OER in basic medium                                                                                    | 22    |
| <b>Fig. S12</b>    | XPS spectra of complex <b>2</b> before catalysis.                                                                                                                                          | 23    |
| <b>Fig. S13</b>    | XPS spectra of complex <b>2</b> after catalysis.                                                                                                                                           | 24    |
| <b>Fig. S14</b>    | LSV profile for the OER of complex <b>2</b> before and after EDTA treatment in phosphate buffer solution.                                                                                  | 25    |
| <b>Table S1</b>    | Comparison of the OER activity in terms of overpotential of complex <b>2</b> with recently reported complexes                                                                              | 14    |
| <b>Equation S1</b> | Determination of number of active site                                                                                                                                                     | 17-19 |
| <b>Equation S2</b> | Determination of Turn Over Frequency (TOF)                                                                                                                                                 | 19    |

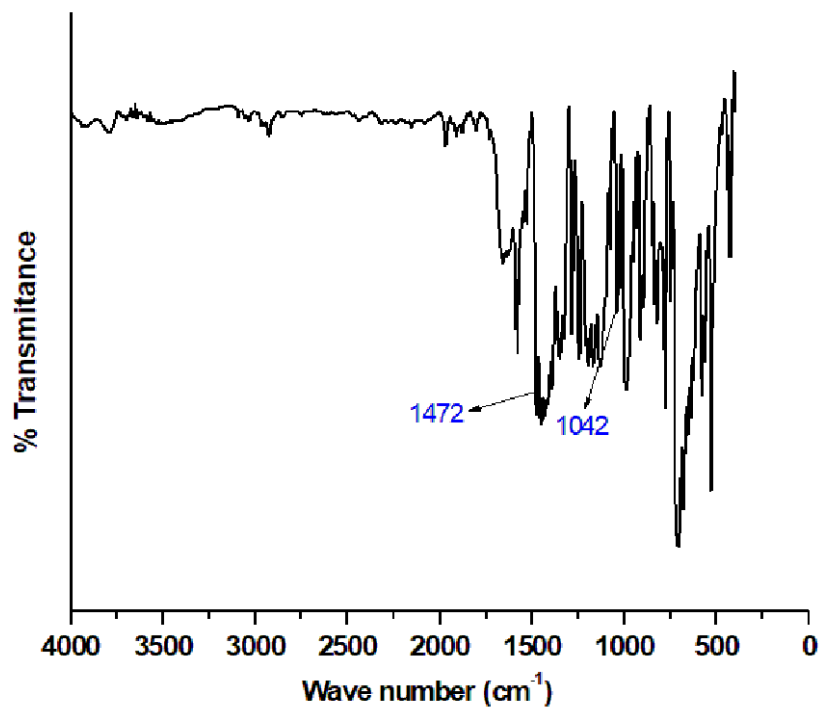

**Fig. S1a:** IR Spectrum of Ligand **KL-1**.

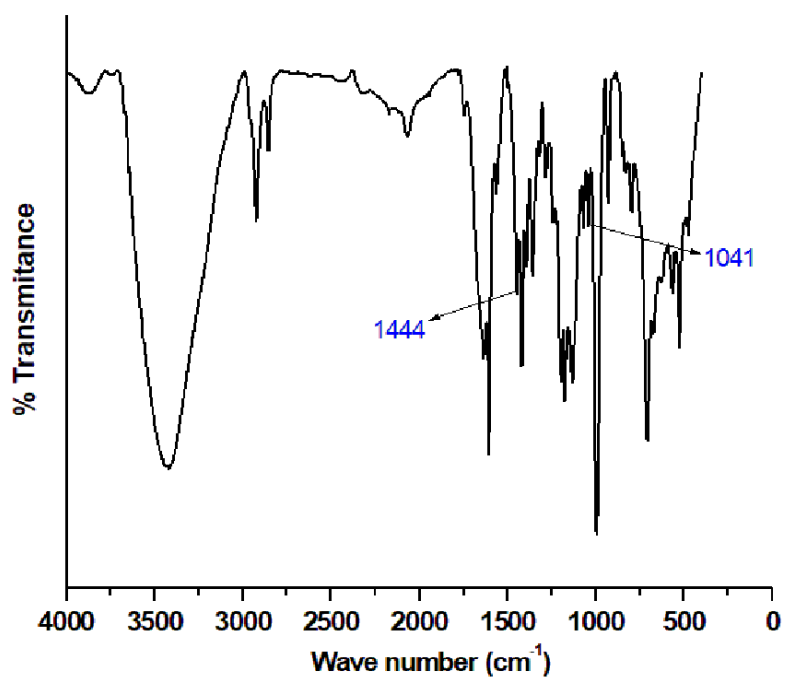

**Fig. S1b:** IR Spectrum of Ligand **KL-2**

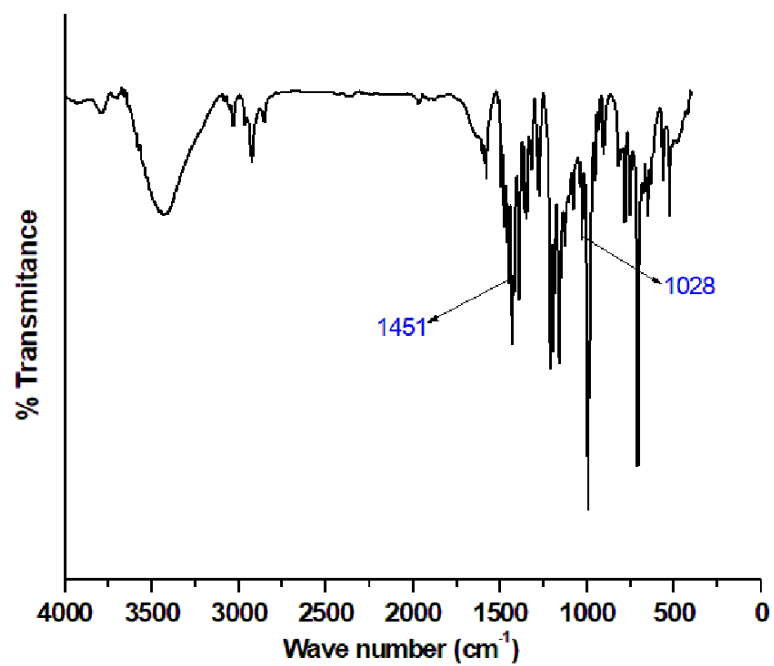

**Fig. S1c:** IR Spectrum of Ligand **KL-3**

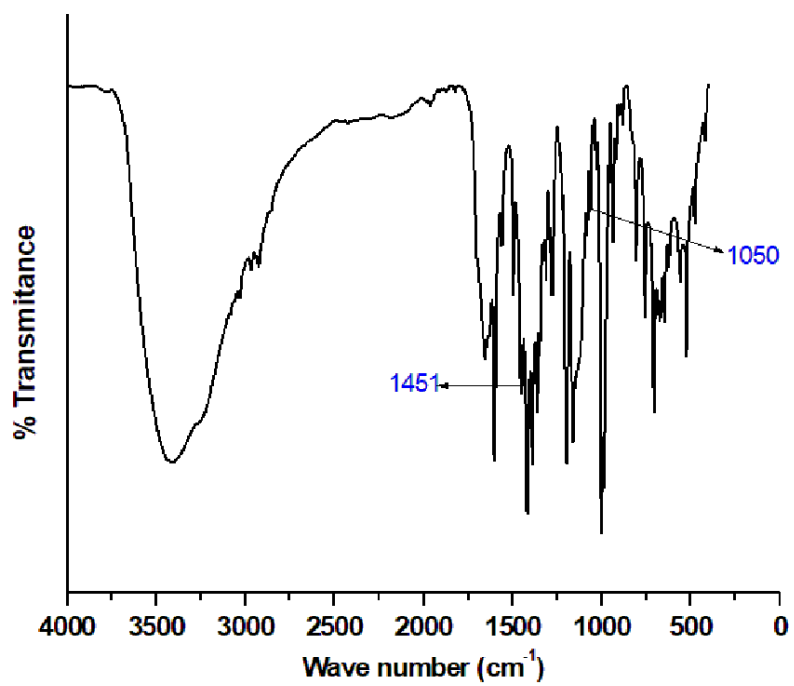

**Fig. S1d:** IR Spectrum of Ligand **KL-4**

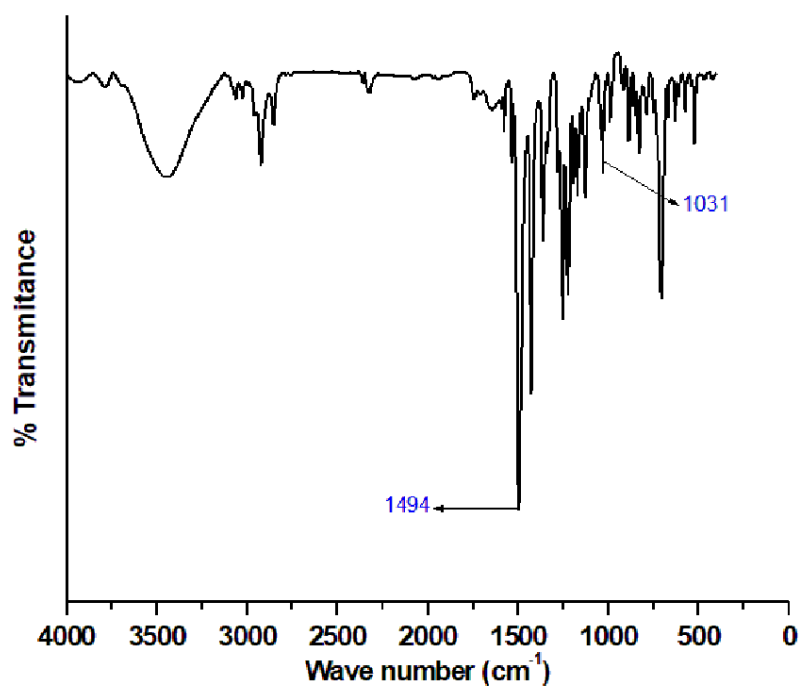

**Fig. S2a:** IR Spectrum of Complex 1

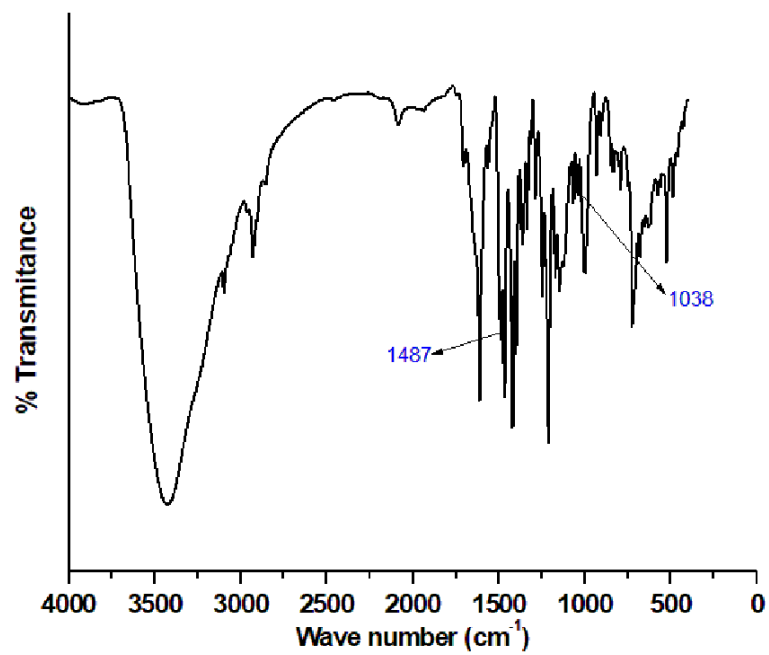

**Fig. S2b:** IR Spectrum of Complex 2

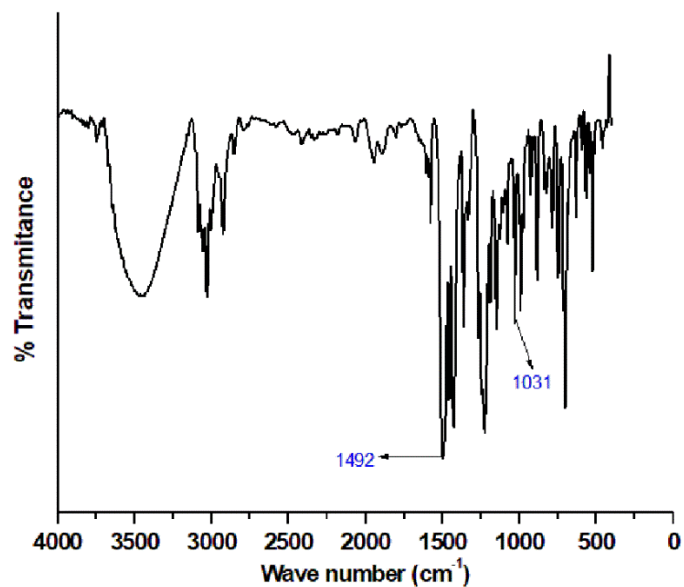

**Fig. S2c:** IR Spectrum of Complex 3

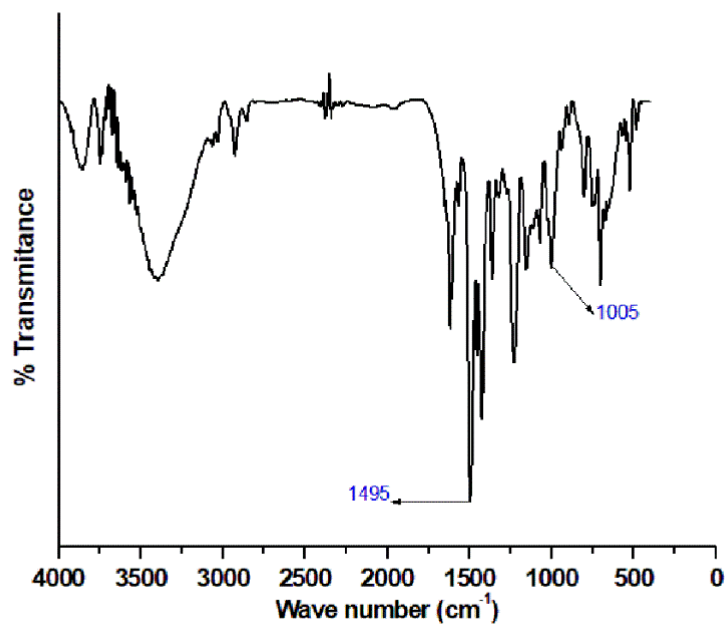

**Fig. S2d:** IR Spectrum of Complex 4

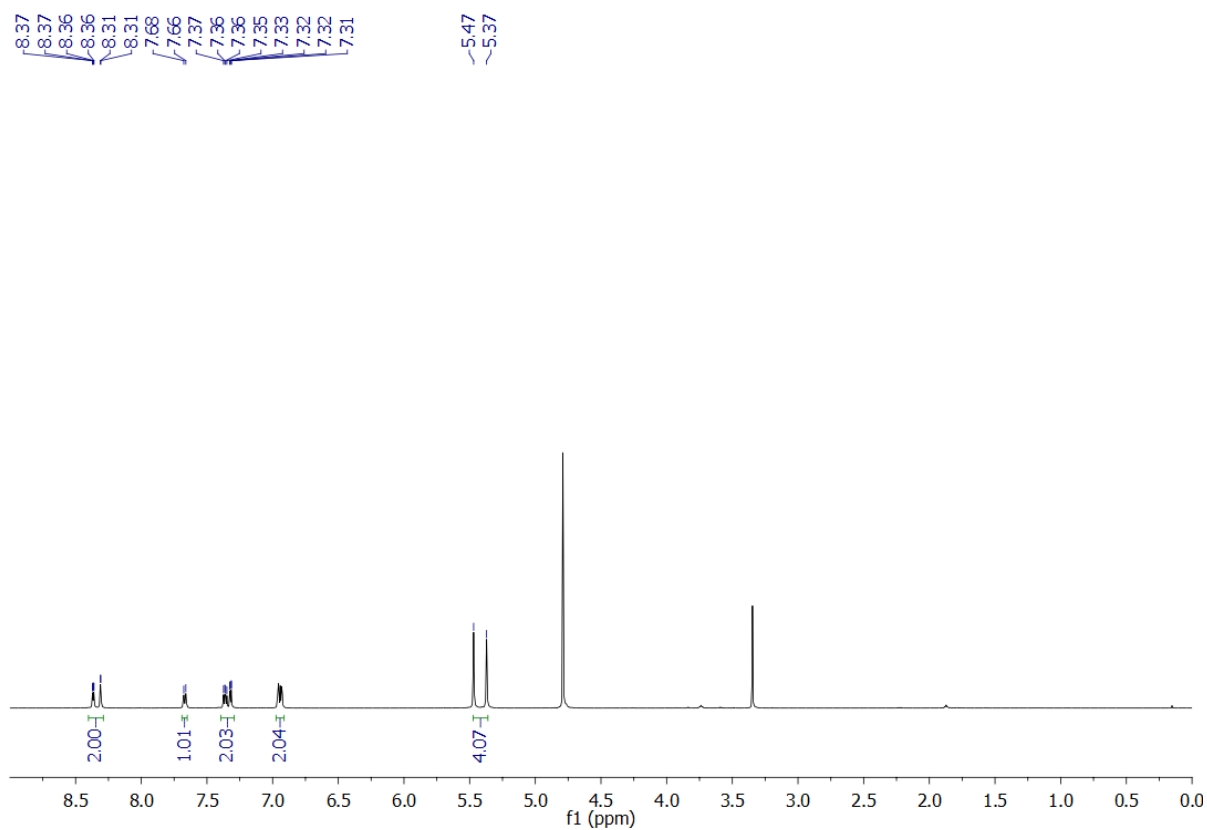

**Fig. S3a:**  $^1\text{H}$  NMR spectrum (500 MHz,  $\text{D}_2\text{O}$ ) of Ligand **KL-1**

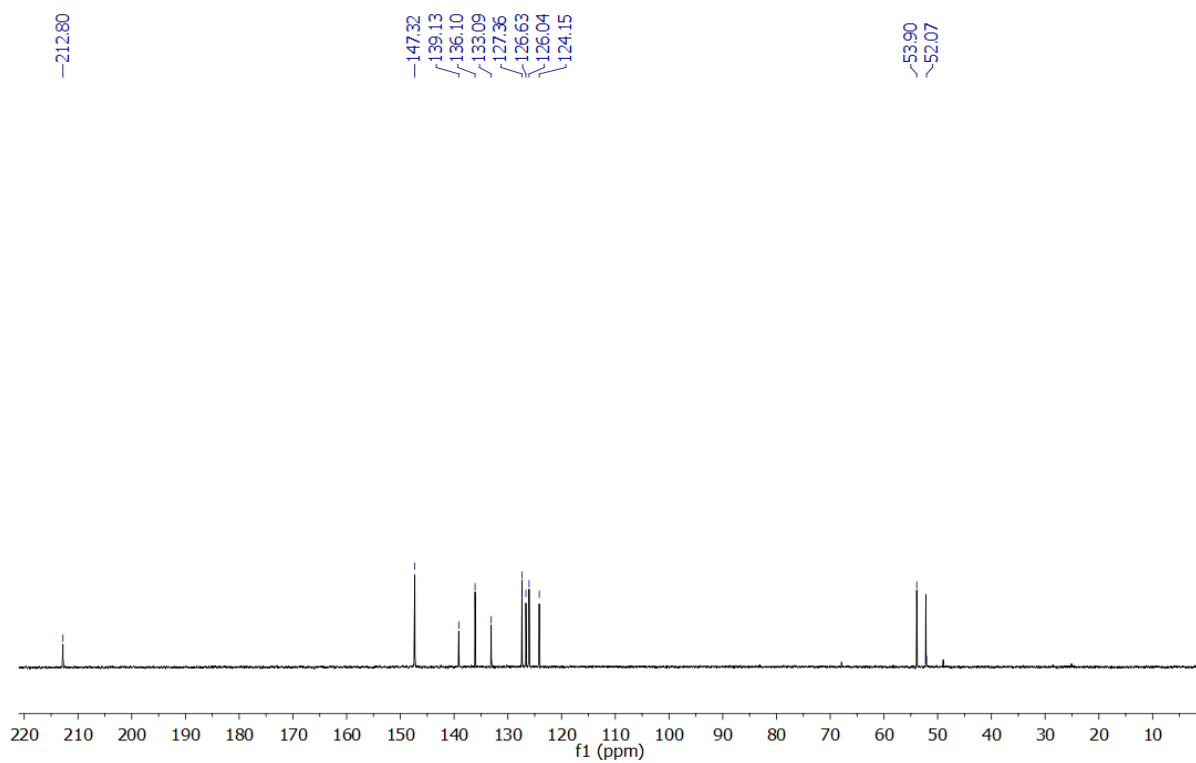

**Fig. S3b:**  $^{13}\text{C}\{^1\text{H}\}$  NMR spectrum (125 MHz,  $\text{D}_2\text{O}$ ) of Ligand **KL-1**

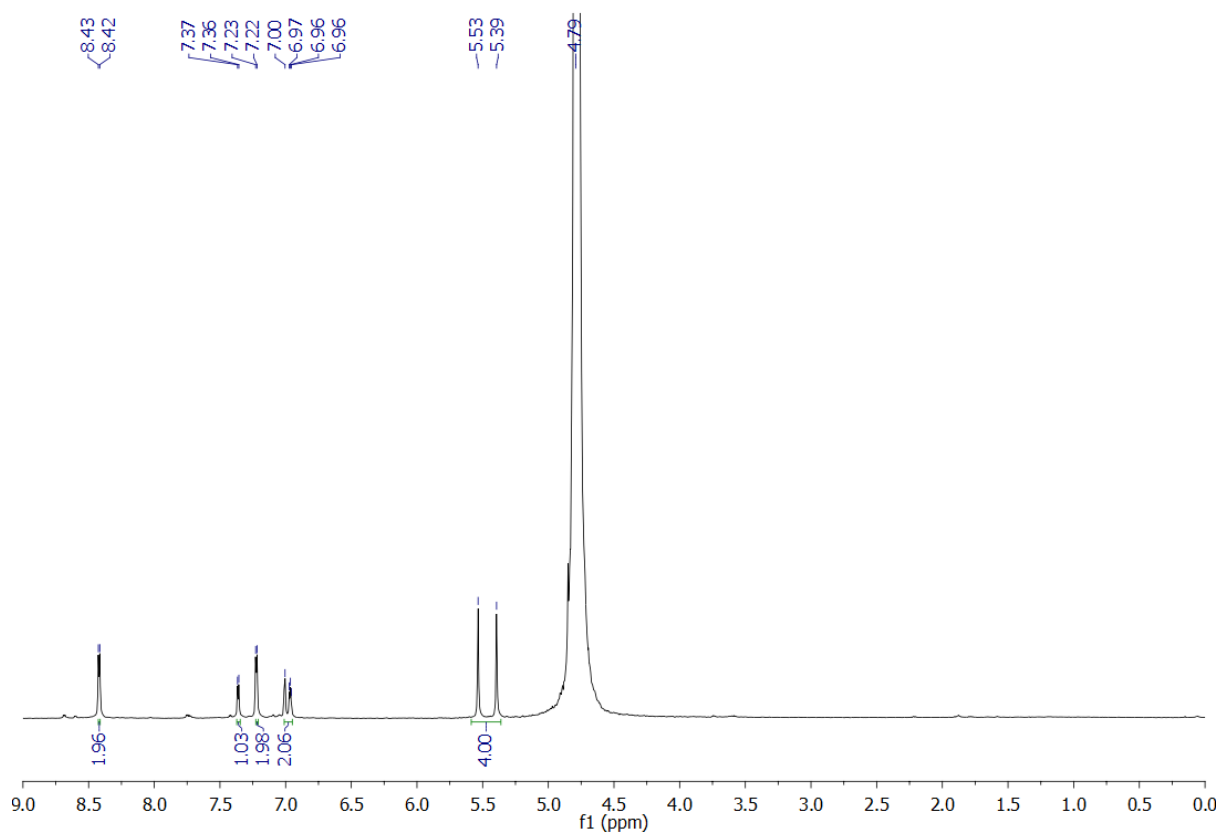

**Fig. S3c:**  $^1\text{H}$  NMR spectrum (500 MHz,  $\text{D}_2\text{O}$ ) of Ligand **KL-2**

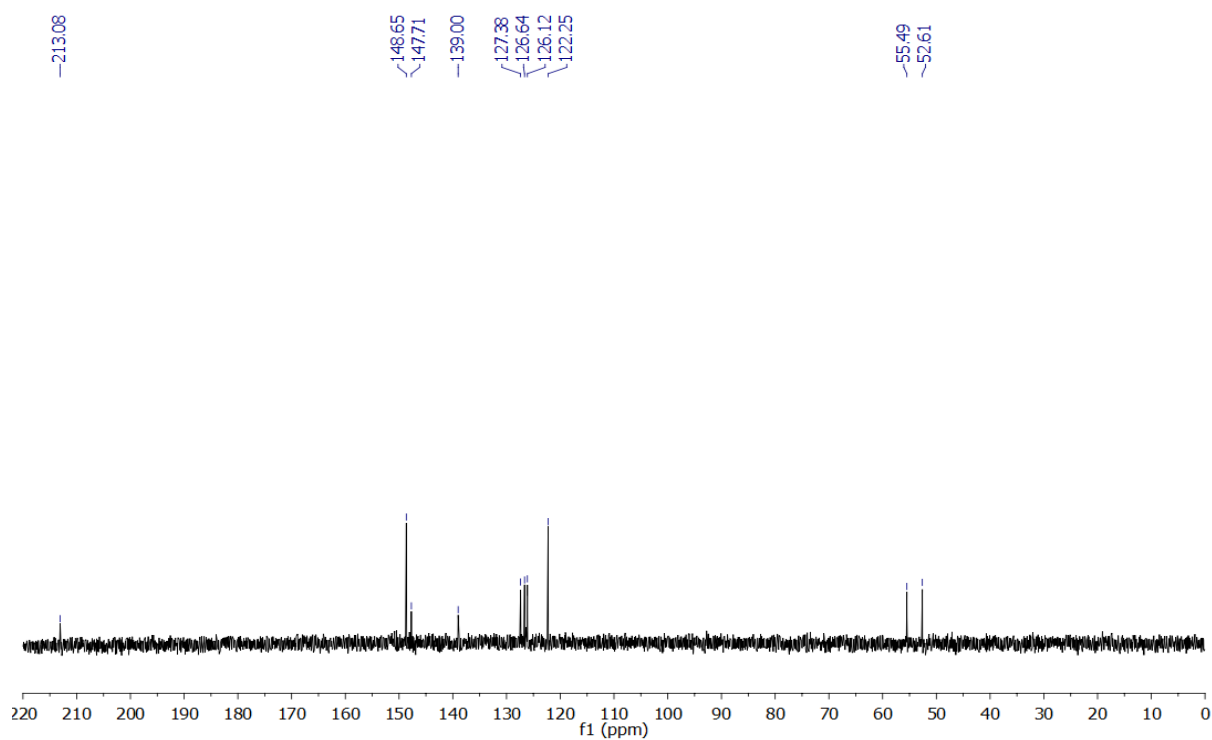

**Fig. S3d:**  $^{13}\text{C}\{^1\text{H}\}$  NMR spectrum (125 MHz,  $\text{D}_2\text{O}$ ) of Ligand **KL-2**

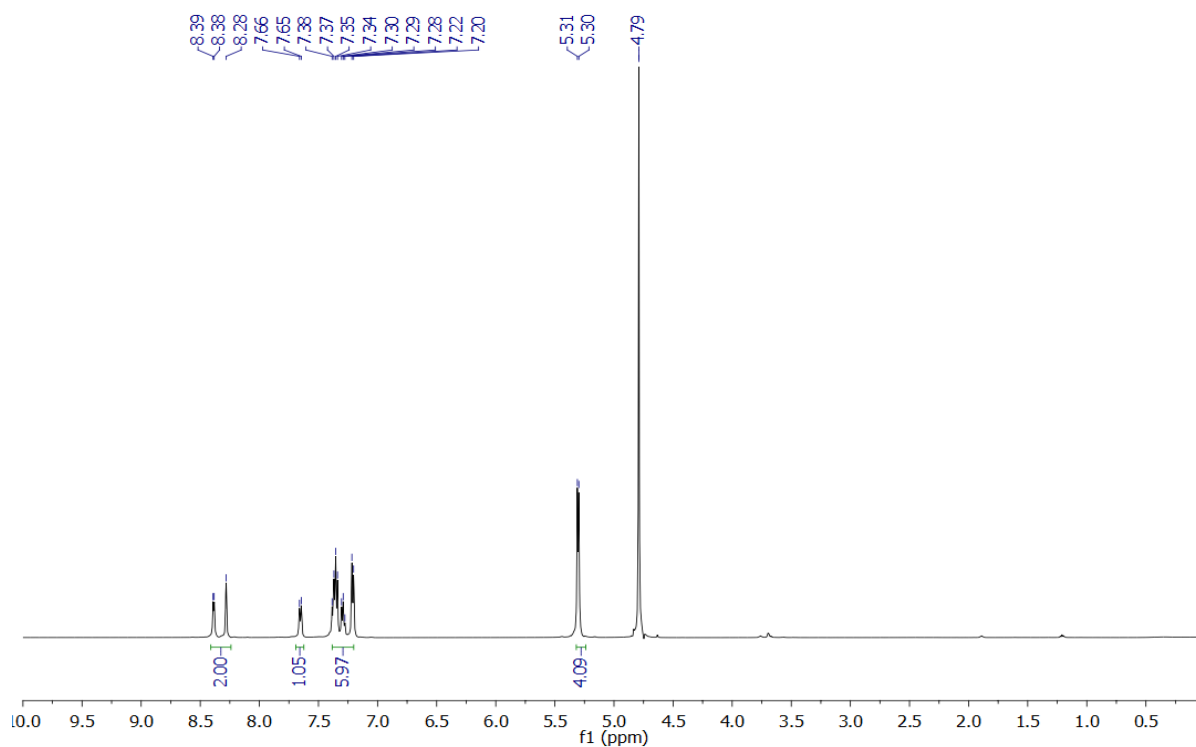

**Fig. S3e:**  $^1\text{H}$  NMR spectrum (500 MHz,  $\text{D}_2\text{O}$ ) of Ligand **KL-3**

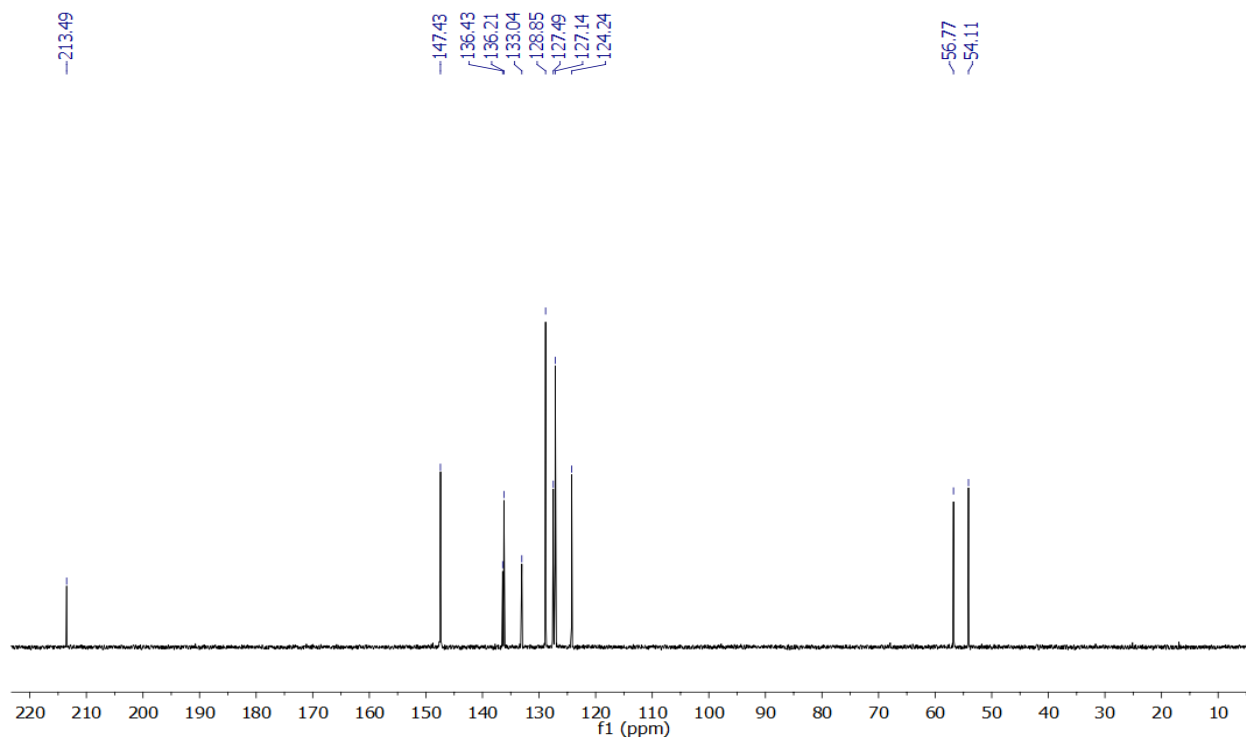

**Fig. S3f:**  $^{13}\text{C}\{^1\text{H}\}$  NMR spectrum (125 MHz,  $\text{D}_2\text{O}$ ) of Ligand **KL-3**



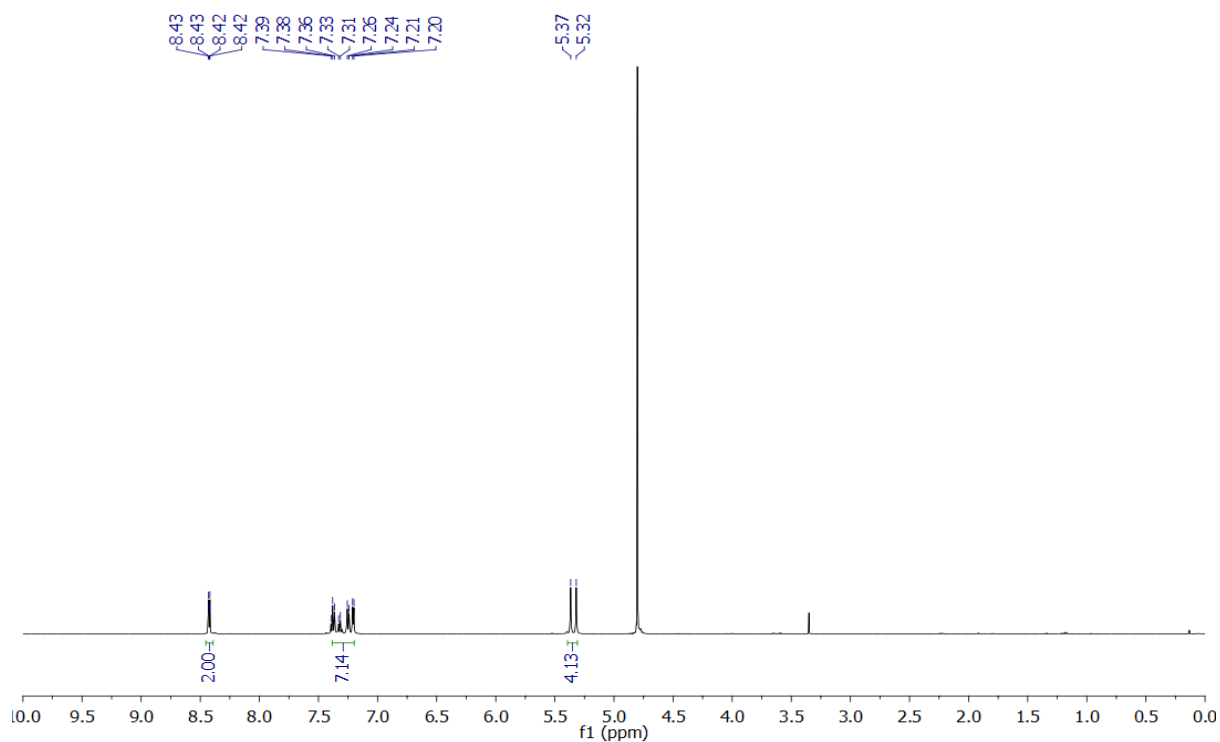

**Fig. S3g:**  $^1\text{H}$  NMR spectrum (500 MHz,  $\text{D}_2\text{O}$ ) of Ligand **KL-4**

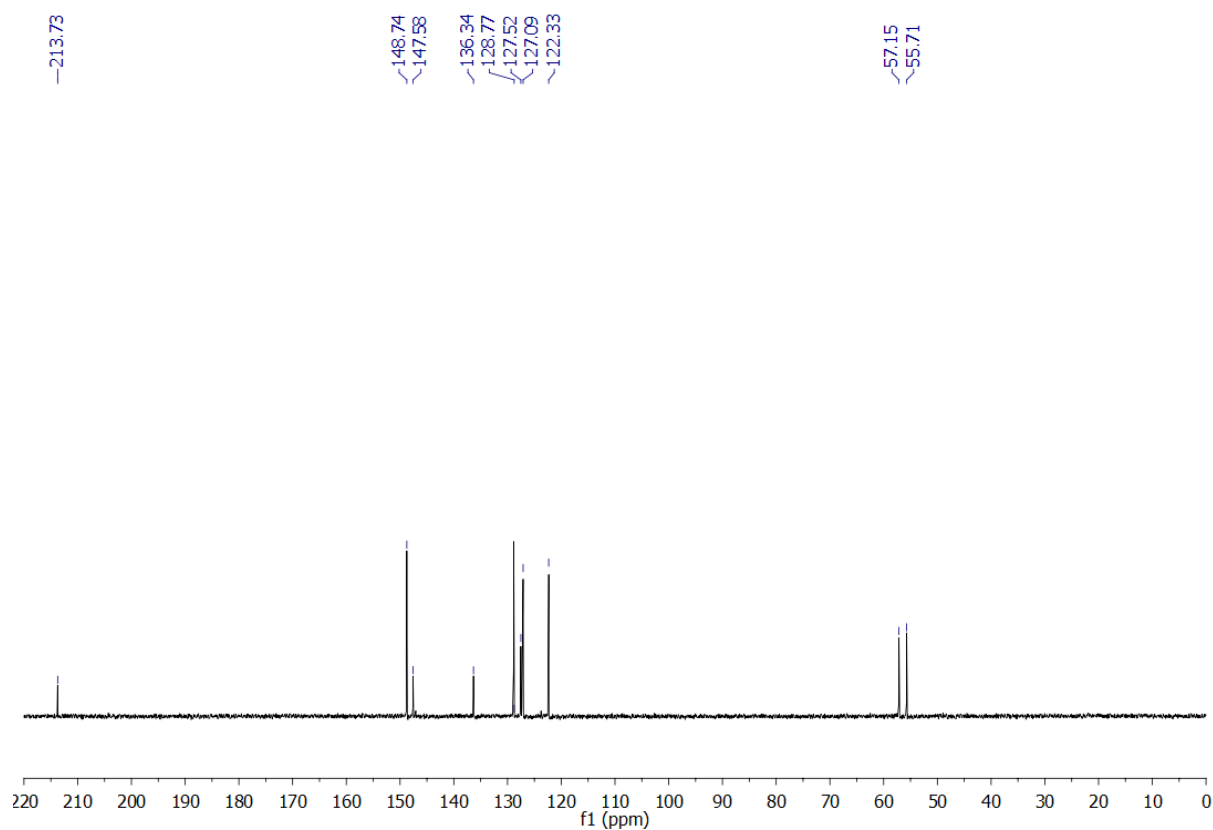

**Fig. S3h:**  $^{13}\text{C}\{^1\text{H}\}$  NMR spectrum (125 MHz,  $\text{D}_2\text{O}$ ) of Ligand **KL-4**

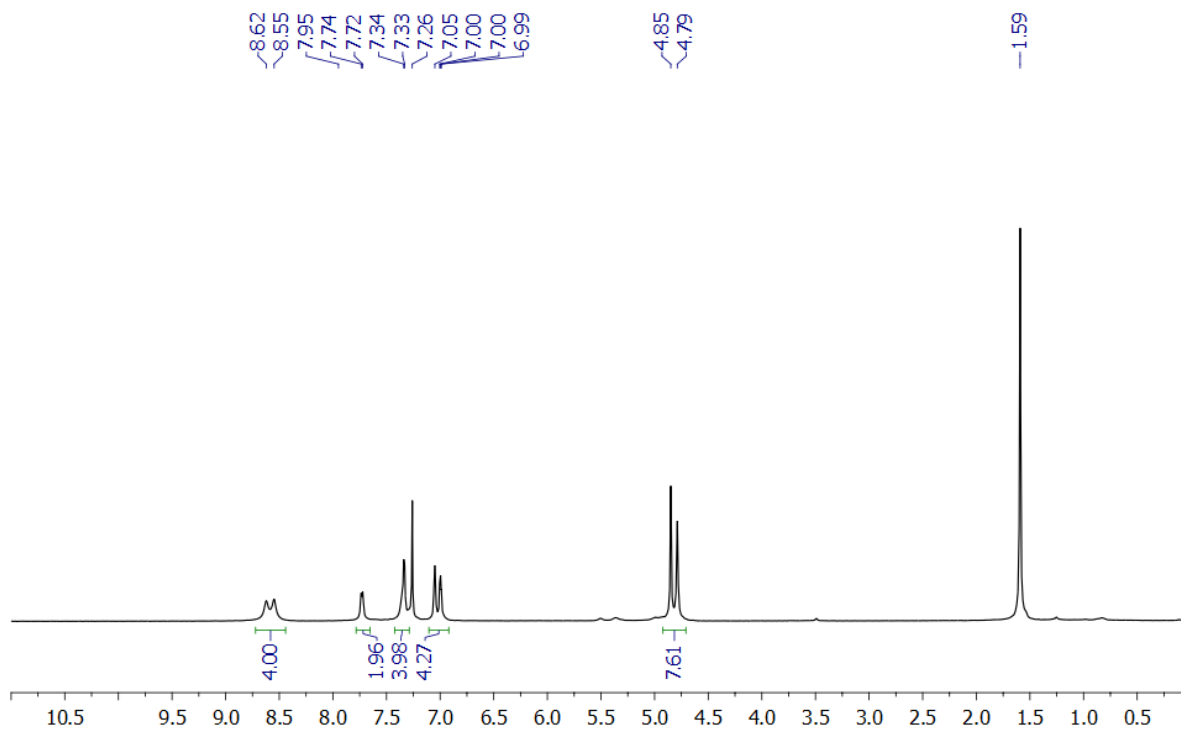

**Fig. S4a:**  $^1\text{H}$  NMR spectrum (500 MHz,  $\text{CDCl}_3$ ) of complex **1**

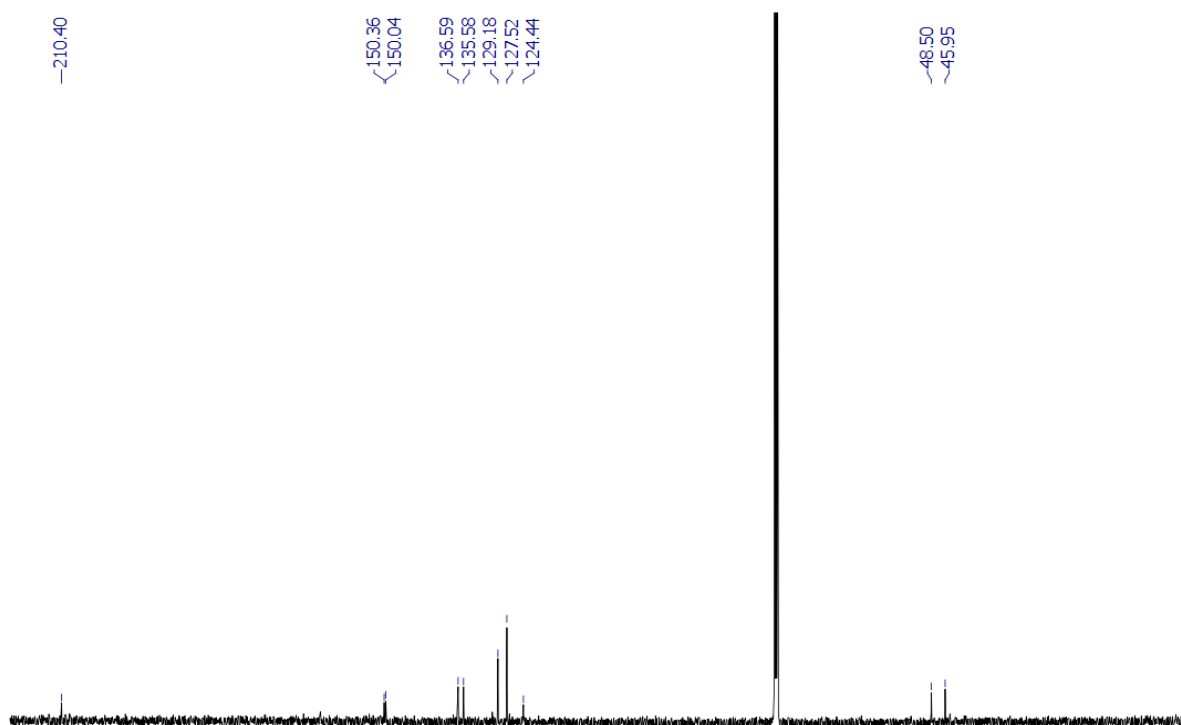

**Fig. S4b:**  $^{13}\text{C}\{^1\text{H}\}$  NMR spectrum (125 MHz,  $\text{CDCl}_3$ ) of complex **1**

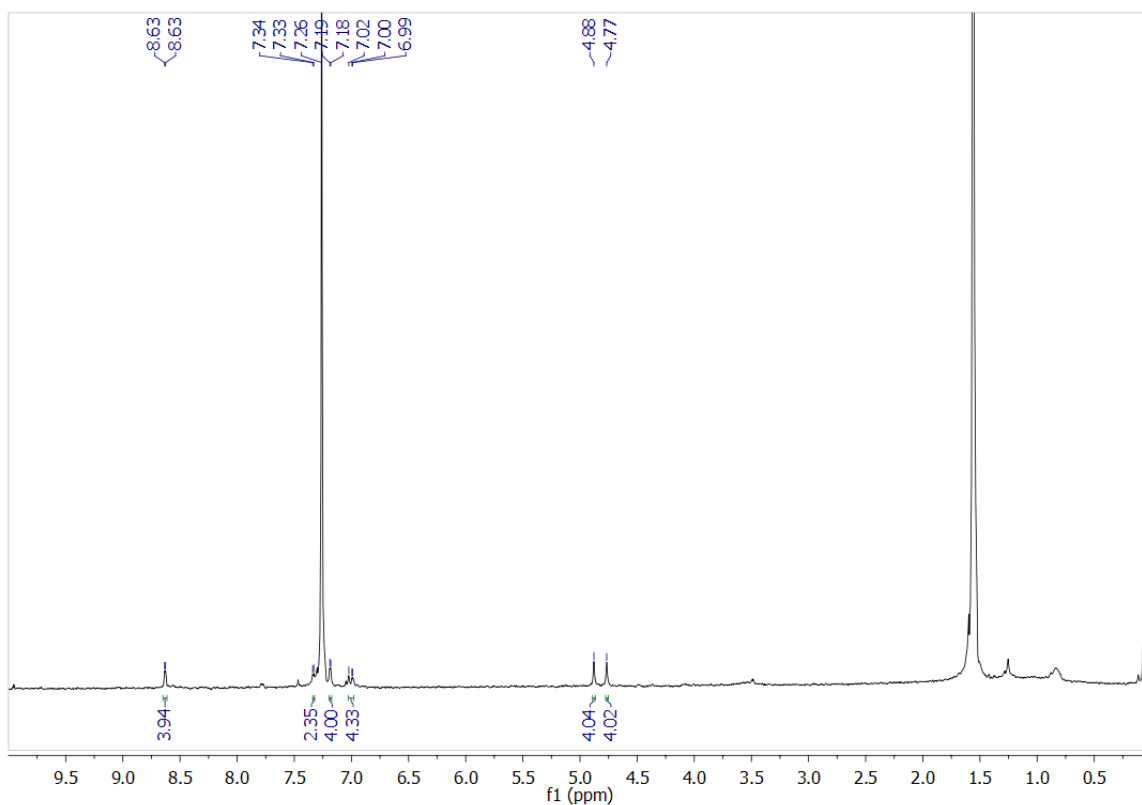

**Fig. S4c:**  $^1\text{H}$  NMR spectrum (500 MHz,  $\text{CDCl}_3$ ) of complex **2**

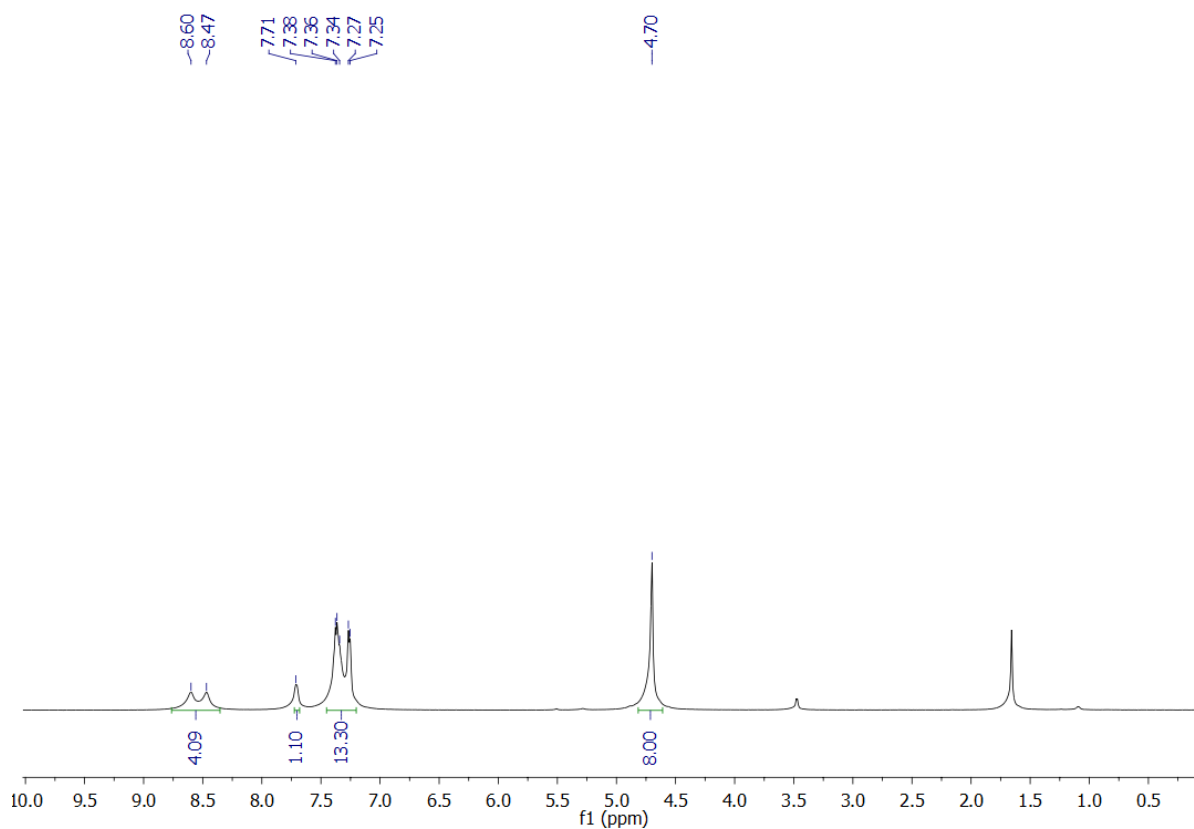

**Fig. S4d:**  $^1\text{H}$  NMR spectrum (500 MHz,  $\text{CDCl}_3$ ) of complex **3**

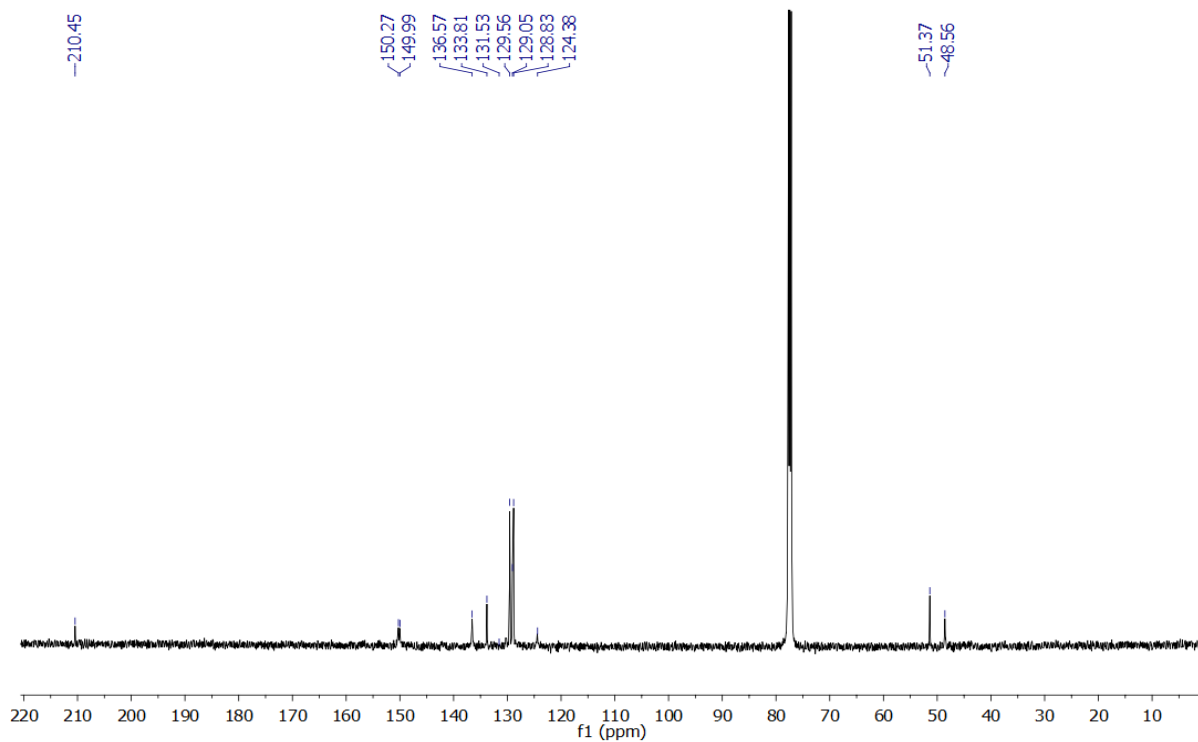

**Fig. S4e:**  $^{13}\text{C}\{^1\text{H}\}$  NMR spectrum (125 MHz,  $\text{CDCl}_3$ ) of complex **3**

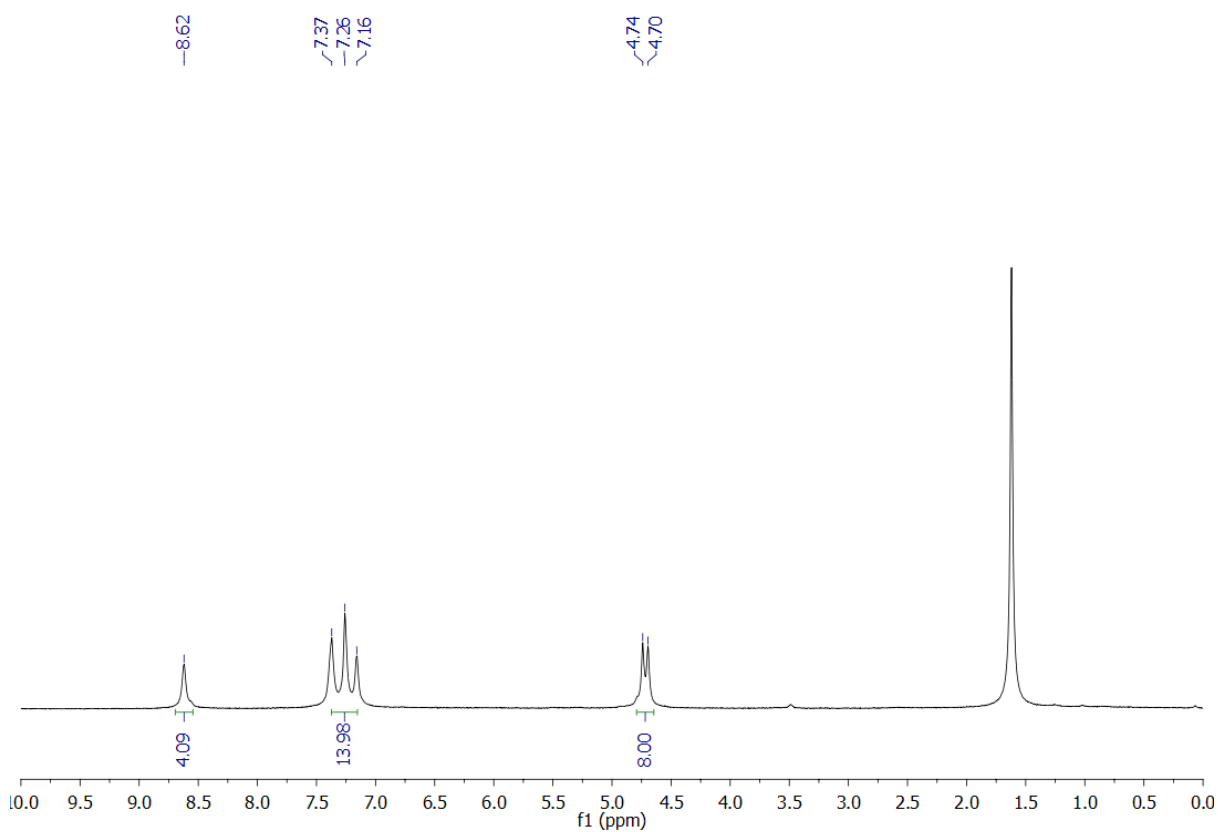

**Fig. S4f:**  $^1\text{H}$  NMR spectrum (500 MHz,  $\text{CDCl}_3$ ) of complex **4**

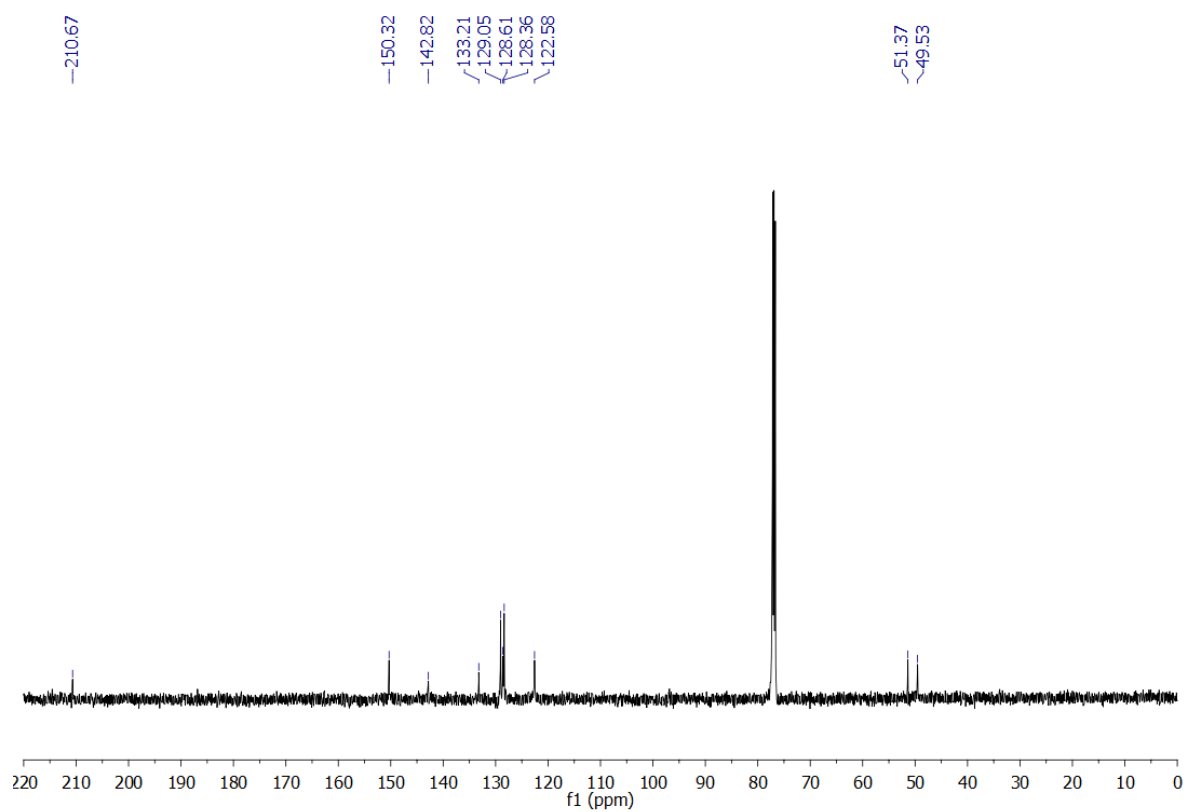

**Fig. S4g:**  $^{13}\text{C}\{^1\text{H}\}$  NMR spectrum (125 MHz,  $\text{CDCl}_3$ ) of complex **4**.

**Table S1.** Comparison of the OER activity of complex **2** with recently reported complexes.

| Catalyst <sup>a</sup>                                        | Electrolyte                           | Overpotential (mV)              | Reference                                  |
|--------------------------------------------------------------|---------------------------------------|---------------------------------|--------------------------------------------|
| Ni[(TMC)(CH <sub>3</sub> CN)](NO <sub>3</sub> ) <sub>2</sub> | Phosphate buffer                      | 590 (0.5 mA cm <sup>-2</sup> )  | Chem. Commun., 2019, 55, 6122–6125.        |
| [NiL](PF <sub>6</sub> ) <sub>2</sub>                         | Phosphate buffer                      | 270 (0.65 mA cm <sup>-2</sup> ) | Catal. Sci. Technol., 2019, 9, 5651–5659.  |
| Ni–Hmfchce                                                   | 0.1 KOH                               | 490 (10 mA cm <sup>-2</sup> )   | Polyhedron, 2019, 174, 114160              |
| Ni(II) 1,1-dithiolate-phosphine                              | 1 M KOH                               | 350 (10 mA cm <sup>-2</sup> )   | Dalton Trans., 2020, 49, 3592              |
| Cobalt Salen Complex-4                                       | 0.1 M potassium borate                | 350 (0.1 mA cm <sup>-2</sup> )  | J. Phys. Chem. C, 2015, 119(17), 8998–9004 |
| O=PN3–Co                                                     | 0.1 M tetrabutyl ammonium perchlorate | 340 (0.5 mA cm <sup>-2</sup> )  | Inorg. Chem., 2021, 60, 614–622.           |

<sup>a</sup> [Ni(TMC)(CH<sub>3</sub>CN)](NO<sub>3</sub>)<sub>2</sub>: where TMC = 1,4,8,11-tetramethyl-1,4,8,11 tetraazacyclotetradecane, [NiL](PF<sub>6</sub>)<sub>2</sub>: where L = bis(2-pyridylmethylimidazolylidene) methane, Ni–Hmfchce: Nickel complex of N'-(2-methylfuran-3-carbonyl)hydrazine carbodithioic acid ethyl ester, Ni(II) 1,1-dithiolate-phosphine: Nickel complex of 2-(methylene-1,1'-dithiolato)-5,5'-dimethylcyclohexane-1,3-dione, Cobalt Salen Complex-4: Cobalt complex of 6,6'-((1E,1'E)-(ethane-1,2-diylbis(azanylylidene))bis(methanylylidene))bis-(2,4-ditert-butylphenol), O=PN3–Co: Cobalt complex of N-(di-tert-butylphosphino)[2,2'-bipyridine]-6-amine, Co(dmgBF<sub>2</sub>)<sub>2</sub>(OH<sub>2</sub>)<sub>2</sub>:BF<sub>2</sub>-annulated cobaloxime, Co(dmgBF<sub>2</sub>)<sub>2</sub>(OH<sub>2</sub>)<sub>2</sub> (Co-DMB, dmgBF<sub>2</sub> = difluoroboryldimethylglyoxime).

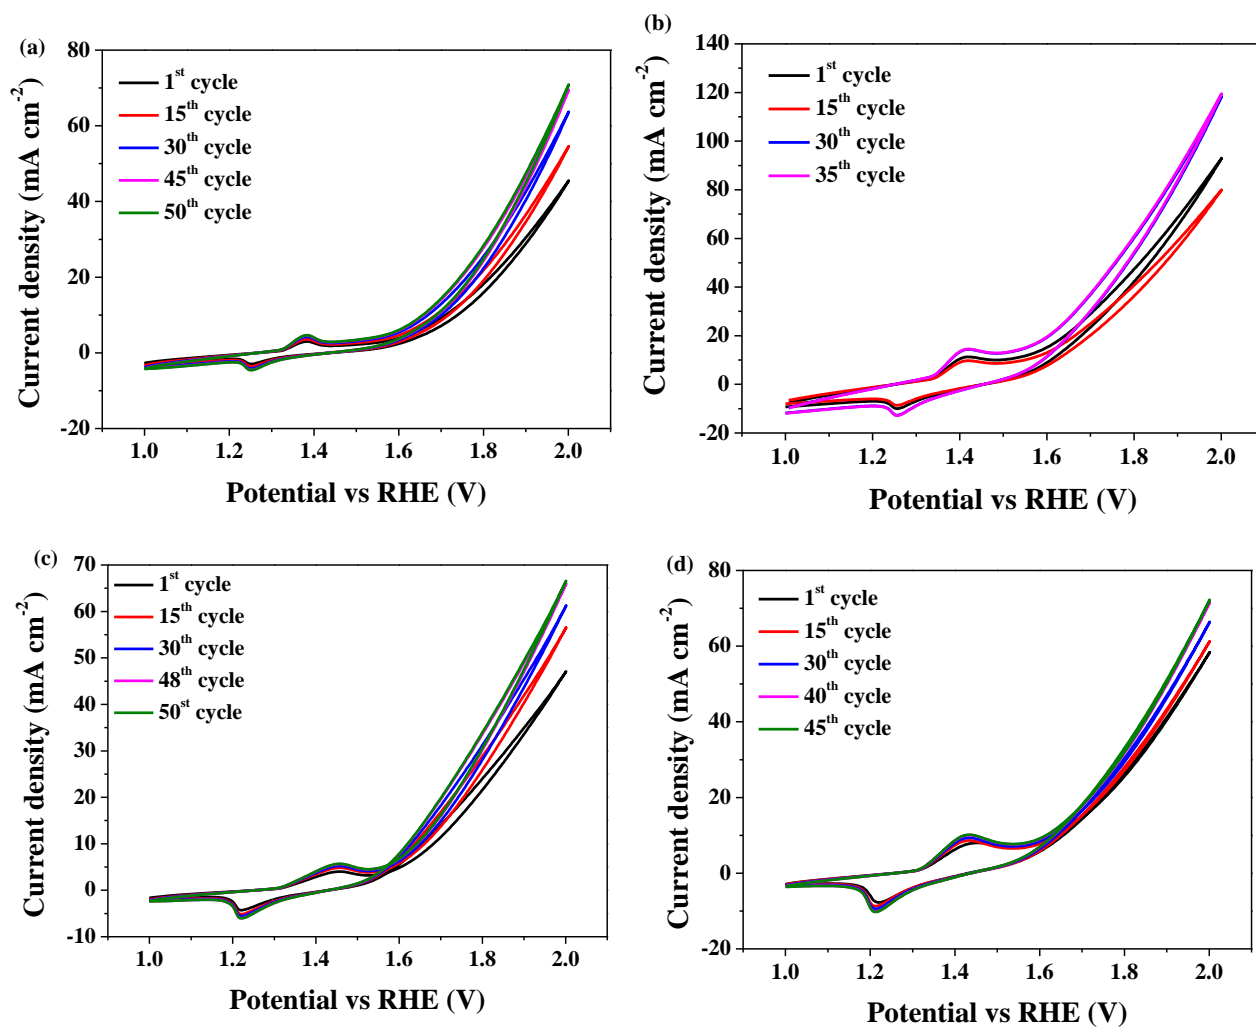

**Fig. S5:** CV profiles for the electrochemical activation of (a) complex 1; (b) complex 2; (c) complex 3; and (d) complex 4 (scan rate  $20 \text{ mV s}^{-1}$ , without iR correction).

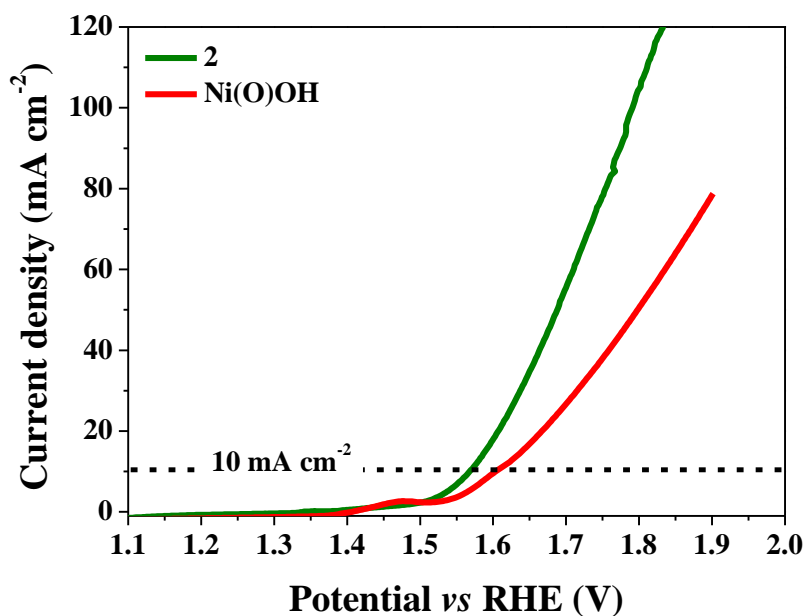

**Fig. S6:** LSV profile for the oxygen evolution reaction of complex **2**@CC compared with Ni(II) salt derived Ni(O)OH@CC in 1.0 M aqueous KOH solution. The complex **2** showed excellent OER activity compared to the Ni(O)OH (scan rate 2 mV s<sup>-1</sup>).

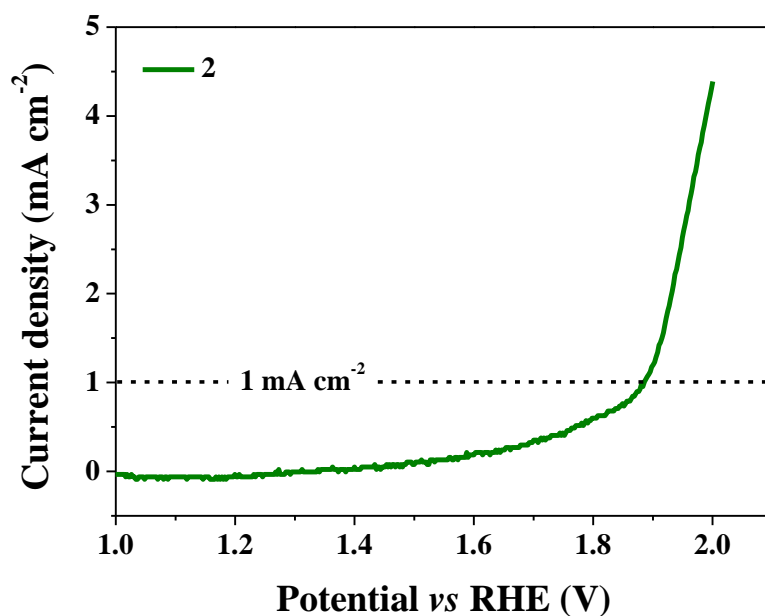

**Fig. S7:** LSV profile for the oxygen evolution reaction of complex **2** in phosphate buffer (pH = 7, scan rate = 2 mV s<sup>-1</sup>).



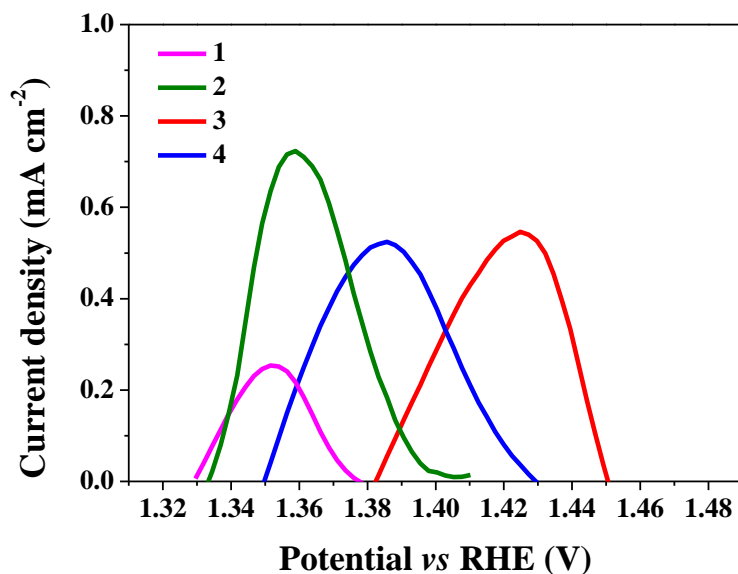

**Fig. S8:** Redox peak integration for the determination of number of active sites for the complexes **1-4**.

**Equation S1. Determination of Number of Active Sites**

The number of active sites in the complexes was calculated by the redox peak integration method.

**For complex 1**

Calculated area associated with the oxidation peak =  $0.00711 \times 10^{-3} \text{ V A}$

Hence the associated charge was =  $0.00711 \times 10^{-3} \text{ V A} / 0.005 \text{ V s}^{-1}$

$$= 1.42 \times 10^{-3} \text{ As}$$

$$= 1.42 \times 10^{-3} \text{ C}$$

Now, the number of electron transferred was =  $1.42 \times 10^{-3} \text{ C} / 1.602 \times 10^{-19} \text{ C}$

$$= 0.88 \times 10^{16}$$

The number of electron calculated above was same as the number of surface active site due to single electron transfer involving  $\text{Ni}^{2+}/\text{Ni}^{3+}$  oxidation process.

Hence,

**The surface-active site of 1 that participated in OER =  $0.88 \times 10^{16}$**

### **For complex 2**

Calculated area associated with the oxidation peak =  $0.02376 \times 10^{-3} \text{ V A}$

Hence the associated charge was =  $0.02376 \times 10^{-3} \text{ V A} / 0.005 \text{ V s}^{-1}$

$$= 4.75 \times 10^{-3} \text{ As}$$

$$= 4.75 \times 10^{-3} \text{ C}$$

Now, the number of electron transferred was =  $4.75 \times 10^{-3} \text{ C} / 1.602 \times 10^{-19} \text{ C}$

$$= 2.96 \times 10^{16}$$

The number of electron calculated above was same as the number of surface active site due to single electron transfer involving  $\text{Ni}^{2+} / \text{Ni}^{3+}$  oxidation process.

Hence,

**The surface-active site of 2 that participated in OER =  $2.96 \times 10^{16}$**

### **For complex 3**

Calculated area associated with the oxidation peak =  $0.01948 \times 10^{-3} \text{ V A}$

Hence the associated charge was =  $0.01948 \times 10^{-3} \text{ V A} / 0.005 \text{ V s}^{-1}$

$$= 3.89 \times 10^{-3} \text{ As}$$

$$= 3.89 \times 10^{-3} \text{ C}$$

Now, the number of electron transferred was =  $3.89 \times 10^{-3} \text{ C} / 1.602 \times 10^{-19} \text{ C}$

$$= 2.43 \times 10^{16}$$

The number of electron calculated above was same as the number of surface active site due to single electron transfer involving  $\text{Ni}^{2+} / \text{Ni}^{3+}$  oxidation process.

Hence,

**The surface-active site of 3 that participated in OER =  $2.43 \times 10^{16}$**

### **For complex 4**

Calculated area associated with the oxidation peak =  $0.01043 \times 10^{-3} \text{ V A}$

Hence the associated charge was =  $0.01043 \times 10^{-3} \text{ V A} / 0.005 \text{ V s}^{-1}$

$$= 2.08 \times 10^{-3} \text{ As}$$

$$= 2.08 \times 10^{-3} \text{ C}$$

Now, the number of electron transferred was =  $2.08 \times 10^{-3} \text{ C} / 1.602 \times 10^{-19} \text{ C}$

$$= 1.29 \times 10^{16}$$

The number of electron calculated above was same as the number of surface active site due to single electron transfer involving Ni<sup>2+</sup>/ Ni<sup>3+</sup> oxidation process.

Hence,

**The surface-active site of 4 that participated in OER =  $1.29 \times 10^{16}$**

### **Equation S2. Determination of Turn-Over Frequency (TOF)**

The TOF of the complexes can be determined using the equation:

$$\text{TOF} = (j \times N_A) / (4 \times F \times n)$$

Where, j = current density at 330 mV

N<sub>A</sub> = Avogadro number

F = Faraday constant

n = number of active Ni-sites

#### **For Complex 1:**

$$\text{TOF} = [(2.12 \times 10^{-3}) (6.023 \times 10^{23})] / [(96485) (4) (0.88 \times 10^{16})]$$

$$\text{TOF} = 3.7 \times 10^{-1} \text{ s}^{-1}$$

#### **For Complex 2:**

$$\text{TOF} = [(10.00 \times 10^{-3}) (6.023 \times 10^{23})] / [(96485) (4) (2.96 \times 10^{16})]$$

$$\text{TOF} = 5.2 \times 10^{-1} \text{ s}^{-1}$$

#### **For Complex 3:**

$$\text{TOF} = [(4.78 \times 10^{-3}) (6.023 \times 10^{23})] / [(96485) (4) (2.43 \times 10^{16})]$$

$$\text{TOF} = 3.0 \times 10^{-1} \text{ s}^{-1}$$

#### **For Complex 4:**

$$\text{TOF} = [(3.52 \times 10^{-3}) (6.023 \times 10^{23})] / [(96485) (4) (1.29 \times 10^{16})]$$

$$\text{TOF} = 4.2 \times 10^{-1} \text{ s}^{-1}$$

### Determination of faradaic efficiency

The amount of oxygen generated during the oxygen evolution reaction was determined by the water displacement method. The amount of O<sub>2</sub> was detected during the chronoamperometric measurement for 1800 s at 20 mA cm<sup>-2</sup> current density.<sup>1-3</sup>

Firstly, the theoretical amount of O<sub>2</sub> was calculated using the following equation from Faraday's law.<sup>1-3</sup>

$$n\text{O}_2(\text{theoretical}) = \frac{Q}{n \times F} = \frac{I \times t}{n \times F} = \frac{0.02 \text{ A} \times 1800 \text{ s}}{4 \times 96485.3 \text{ s A mol}^{-1}} = 0.00093 \text{ mmol}$$

Where nO<sub>2</sub> denotes the theoretically calculated amount of O<sub>2</sub>, Q is the amount of applied charge, *n* is the number of electrons participating in the OER reaction (4 electrons), *F* is the Faraday constant (96485.3 s A mol<sup>-1</sup>), *I* is the applied current (0.02 A), and *t* is the reaction time (1800 s).

At the time of chronoamperometric measurements, the amount of O<sub>2</sub> produced during the experiment was measured and the theoretically calculated amount was compared with the actually generated amount of O<sub>2</sub>. Further, the faradaic efficiency was calculated using the following equation:

$$\text{Faradaic efficiency (\%)} = \frac{n\text{O}_2(\text{experimental})}{n\text{O}_2(\text{Theoretical})} \times 100 = \frac{0.000915 \text{ mmol}}{0.00093 \text{ mmol}} \times 100 = 98.3\%$$

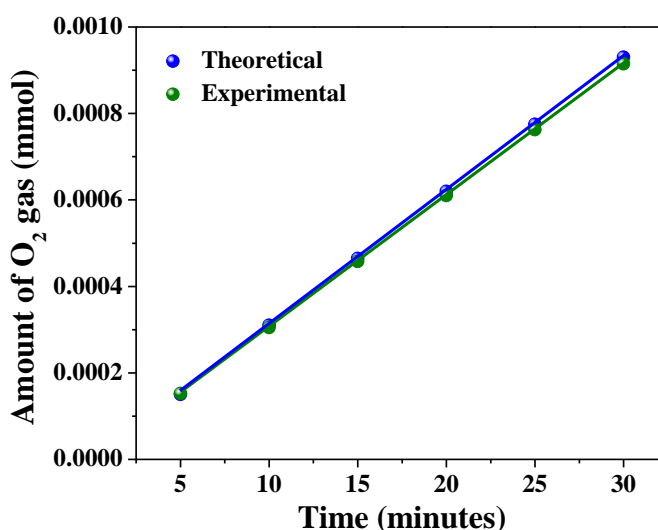

**Fig. S9.** Plot for the amount of theoretically calculated O<sub>2</sub> (blue line) and experimentally measured O<sub>2</sub> (green line) versus time for complex 2.

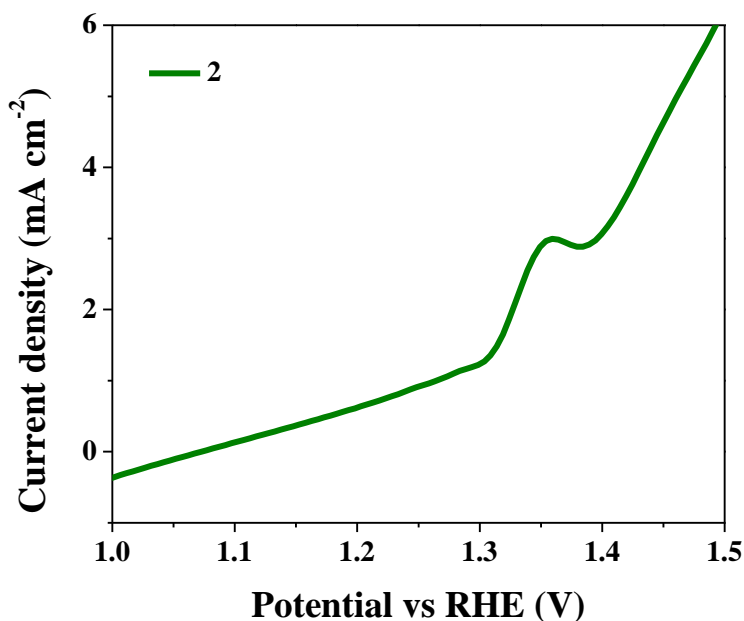

**Fig. S10:** Differential pulse voltammetric profile for the complex 2 utilized for the determination of number electron transferred for the redox peak.

The number of electrons could be calculated using DPV by the following equation at a constant pH.<sup>4-5</sup>

$$E_p - E_{p/2} = 2.218 \text{ RT/nF} = 57/n \dots \dots \dots (1)$$

Therefore, the equation (1) gives the number of electron transferred is

$$n = 57 / E_p - E_{p/2}$$

where  $E_p$  = peak potential of DPV

$E_{p/2}$  = potential at which half the peak current is observed

$n$  = number of electron(s) transferred

From DPV, the  $E_p$  was calculated to be 1.357 V while  $E_{p/2}$  was determined to be 1.313 V for complex 2.

$$n = 57 / 1.357 - 1.313$$

$$n = 57 / 44$$

$$\mathbf{n = 1.29}$$

Therefore, the number of electron transferred for the redox peak is calculated to be one.

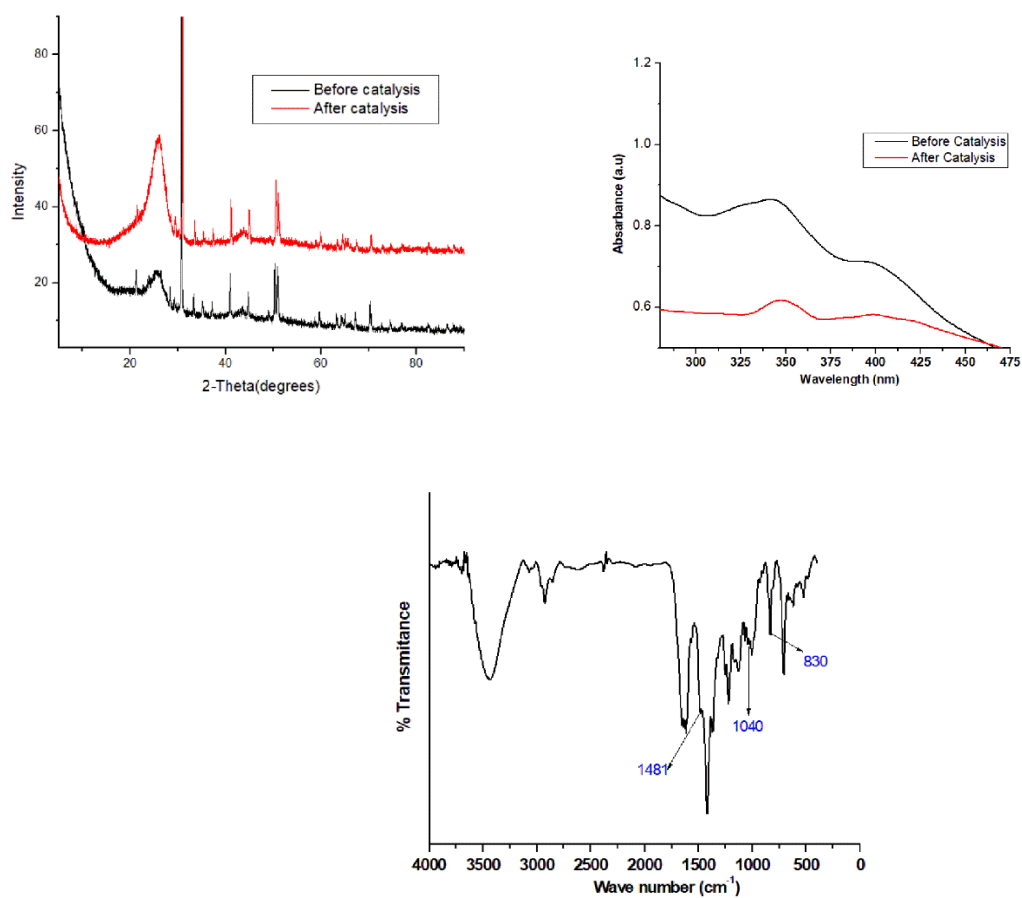

**Fig. S11:** (a) Powder XRD pattern of complex **2** and after 2 h OER catalysis indicating that the molecular structure was retained after 2 h OER catalysis (b) UV-vis. spectra of complex **2** before the OER and after the 2 h OER catalysis and (c) IR spectrum of complex **2** after 2 h OER catalysis indicating the new peak at  $830\text{ cm}^{-1}$  assigned for the Ni-O-Ni stretching in Ni(O)OH active catalyst.

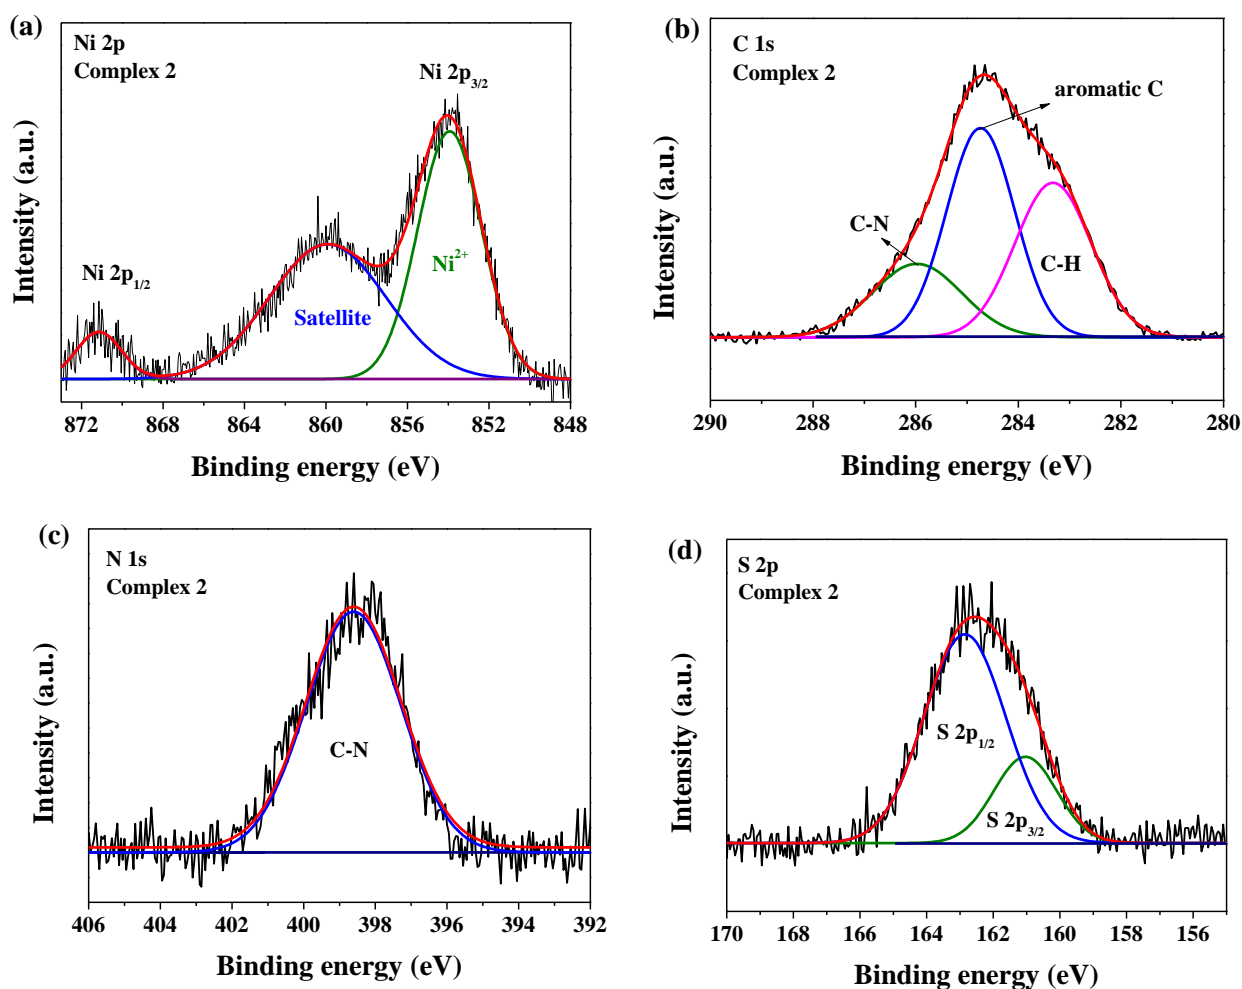

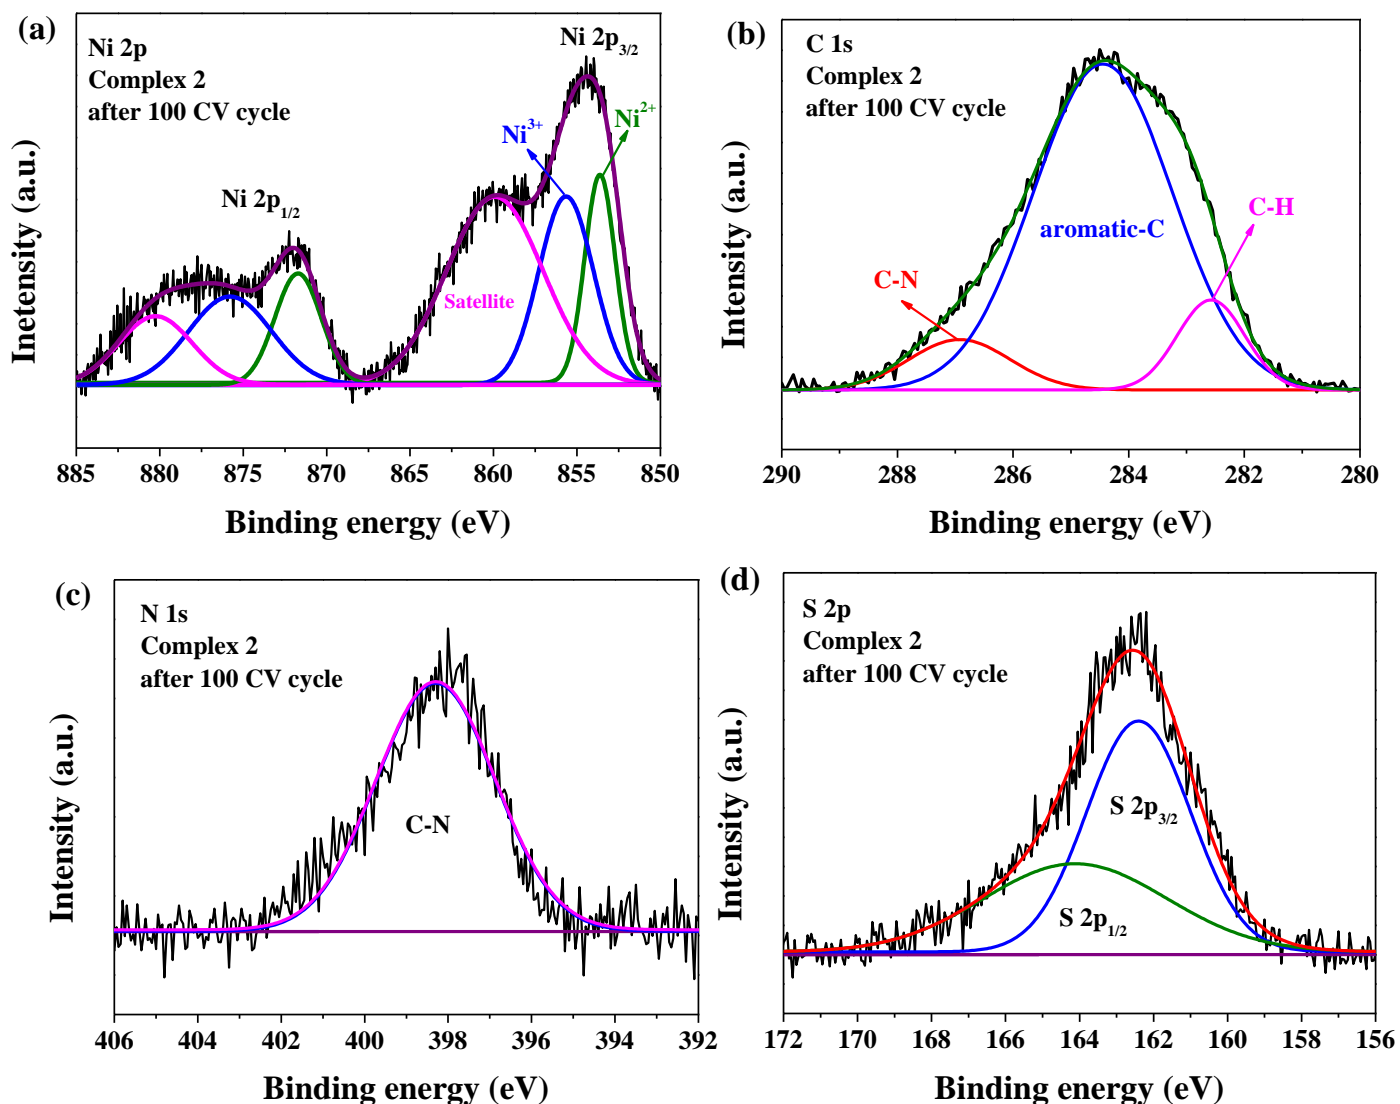

**Fig. S13:** (a) Ni 2p XPS of complex **2** showing the peaks at 854.4 eV and 871.8 eV assigned for the Ni2p<sub>3/2</sub> and Ni2p<sub>1/2</sub>, respectively, the peak at 853.6 eV and 855.6 eV were attributed to the Ni<sup>2+</sup> and Ni<sup>3+</sup> species, respectively; (b) C 1s spectra of complex **2** showing three peaks at 286.9 eV, 285.0 eV and 283.6 eV corresponded to the C-N bond, aromatic C and C-H bond, respectively; (c) C 1s spectra of complex **2** indicating the peak at 398.3 eV assigned for the N-C bond; and (d) S 2p XPS indicating two peaks at 162.3 eV and 164.2 eV attributed to the S 2p<sub>3/2</sub> and S 2p<sub>1/2</sub>, respectively.



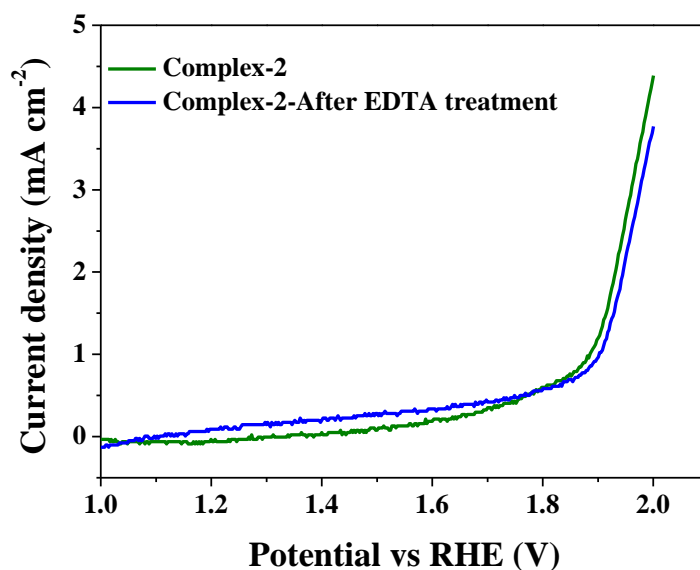

**Fig. S14:** LSV profiles for the oxygen evolution reaction of complex **2** before and after EDTA treatment. Complex **2** was activated first and treated with EDTA to remove the surface NiOOH. After the removal of surface NiOOH, LSV was recorded in phosphate buffer (pH 7).

## References

1. J. Jia, L. C. Seitz, J. D. Benck, Y. Huo, Y. Chen, J. W. D. Ng, T. Bilir, J. S. Harris, T. F. Jaramillo, *Nat. Commun.* 2016, **7**, 13237.
2. A. Paracchino, V. Laporte, K. Sivula, M. Grätzel, E. Thimsen, *Nat. Mater.* 2011, **10**, 456-461.
3. I. M. Mosa, S. Biswas, A. M. El-Sawy, V. Botu, C. Guild, W. Song, R. Ramprasad, J. F. Ruslingace, S. L. Suib, *J. Mater. Chem. A* 2016, **4**, 620-631.
4. A.J. Bard, L.R. Faulkner, *Electrochemical methods: fundamentals and applications*, 2001, <https://doi.org/10.1038/nprot.2009.120>.Multi-stage.
5. D.A.C. Brownson, C.E. Banks, *The handbook of graphene electrochemistry*, 2014, <https://doi.org/10.1007/978-1-4471-6428-9>.
